# Supplementary material
Source: PubMed Central journal article supplement (PMC4492382)
Supplement: 10.1534_115.177030_genetics.115.177030-2.pdf [file 10.1534_115.177030_genetics.115.177030-2.pdf]

**Table S2 *BayeScan* outlier SNPs**

| Sample        | Number of Populations | Position on X chromosome | Posterior Probability | Posterior Odds<br>$\log_{10}(PO)$ | alpha        | $F_{ST}$     |
|---------------|-----------------------|--------------------------|-----------------------|-----------------------------------|--------------|--------------|
| Europe-Africa | 7                     | 2,054,375                | 1.000                 | 3.699                             | 1.834        | 0.739        |
|               |                       | <b>2,035,164</b>         | <b>0.926</b>          | <b>1.095</b>                      | <b>1.700</b> | <b>0.712</b> |
|               |                       | 2,173,611                | 0.928                 | 1.111                             | 1.677        | 0.709        |
|               |                       | <b>2,035,208</b>         | <b>0.917</b>          | <b>1.042</b>                      | <b>1.676</b> | <b>0.708</b> |
|               |                       | <b>2,034,789</b>         | <b>0.919</b>          | <b>1.054</b>                      | <b>1.665</b> | <b>0.706</b> |
|               |                       | <b>2,032,933</b>         | <b>0.921</b>          | <b>1.064</b>                      | <b>1.661</b> | <b>0.706</b> |
|               |                       | <b>2,035,090</b>         | <b>0.920</b>          | <b>1.059</b>                      | <b>1.641</b> | <b>0.702</b> |
|               |                       | 2,054,995                | 0.996                 | 2.442                             | 1.502        | 0.687        |
|               |                       | 2,039,998                | 0.990                 | 1.996                             | 1.449        | 0.678        |
|               |                       | 2,055,053                | 0.988                 | 1.930                             | 1.438        | 0.676        |
|               |                       | 1,999,363                | 0.976                 | 1.617                             | 1.391        | 0.668        |
|               |                       | 2,053,119                | 0.976                 | 1.617                             | 1.379        | 0.666        |
|               |                       | 2,056,220                | 0.972                 | 1.537                             | 1.369        | 0.664        |
|               |                       | 2,054,347                | 0.966                 | 1.448                             | 1.337        | 0.658        |
|               |                       | 1,907,955                | 0.955                 | 1.329                             | 1.248        | 0.643        |
|               |                       | 2,056,678                | 0.933                 | 1.141                             | 1.248        | 0.642        |
|               |                       | 2,055,460                | 0.911                 | 1.012                             | 1.246        | 0.642        |
|               |                       | 1,905,431                | 0.955                 | 1.329                             | 1.231        | 0.640        |
|               |                       | 1,999,517                | 0.950                 | 1.275                             | 1.222        | 0.639        |
|               |                       | 1,974,821                | 0.946                 | 1.242                             | 1.216        | 0.638        |
|               |                       | 1,903,117                | 0.942                 | 1.212                             | 1.202        | 0.635        |
|               |                       | 1,974,723                | 0.923                 | 1.081                             | 1.162        | 0.628        |
|               |                       | 2,090,045                | 0.901                 | 0.958                             | -1.521       | 0.181        |
|               |                       | 2,179,117                | 0.926                 | 1.095                             | -1.573       | 0.174        |
|               |                       | 2,136,315                | 0.941                 | 1.203                             | -1.584       | 0.171        |
|               |                       | 1,963,657                | 0.928                 | 1.108                             | -1.609       | 0.170        |
|               |                       | 2,181,270                | 0.948                 | 1.257                             | -1.589       | 0.170        |
|               |                       | 1,984,277                | 0.933                 | 1.147                             | -1.644       | 0.166        |
|               |                       | 2,171,163                | 0.953                 | 1.309                             | -1.626       | 0.166        |
|               |                       | 1,994,497                | 0.961                 | 1.394                             | -1.673       | 0.160        |
|               |                       | 2,069,894                | 0.954                 | 1.315                             | -1.691       | 0.160        |
|               |                       | 2,179,478                | 0.973                 | 1.550                             | -1.702       | 0.157        |
| 2,141,928     | 0.976                 | 1.606                    | -1.733                | 0.153                             |              |              |
| 2,153,801     | 0.973                 | 1.557                    | -1.742                | 0.153                             |              |              |
| 1,965,347     | 0.979                 | 1.669                    | -1.782                | 0.148                             |              |              |
| 2,139,505     | 0.971                 | 1.525                    | -1.846                | 0.144                             |              |              |

|        |   |            |       |       |       |       |
|--------|---|------------|-------|-------|-------|-------|
| Africa | 5 | 2,054,375  | 0.998 | 2.698 | 1.731 | 0.674 |
|        |   | 1,972,008  | 0.959 | 1.365 | 1.343 | 0.599 |
|        |   | 1,972,114  | 0.958 | 1.354 | 1.335 | 0.598 |
|        |   | 2,054,995  | 0.955 | 1.331 | 1.324 | 0.595 |
|        |   | 2,112,292  | 0.945 | 1.238 | 1.290 | 0.589 |
|        |   | 2,141,480  | 0.939 | 1.190 | 1.296 | 0.590 |
|        |   | 2,053,119  | 0.899 | 0.951 | 1.215 | 0.573 |
|        |   | 1,944,464* | 0.880 | 0.864 | 1.178 | 0.566 |
|        |   | 2,039,998* | 0.865 | 0.807 | 1.140 | 0.558 |

---

*BayeScan* analyses were run on a X-chromosomal 300-kb sequence window around the *ph* locus. Significant outlier SNPs at an FDR of 5% are shown here. For the African-exclusive analysis, also outliers at an FDR of 7% are given (marked by asterisks). Six outlier SNPs are located in the region of significant CLR values. Bold font highlights the five outlier SNPs that are located in *ph-p/CG3835* intergenic region and that are not already significantly segregating when only African populations are considered. The SNP at X-chromosomal position 2,039,998 (FlyBase release 5) is located within in the region of significant CLR values, but not between *ph-p* and *CG3835*.
