# Supplementary material
Source: PubMed Central journal article supplement (PMC4492382)
Supplement: 10.1534_115.177030_genetics.115.177030-3.pdf [file 10.1534_115.177030_genetics.115.177030-3.pdf]

**Table S1 Fold-changes in *lacZ* reporter gene expression**

| Promoter    | Comparison    |           | Fold-change |         |
|-------------|---------------|-----------|-------------|---------|
|             | between       | within    |             |         |
| <i>ph-p</i> | BR/MG         | 17°C & NL | 2.67        |         |
|             |               | 17°C & ZK | 3.08 **     |         |
|             |               | 28°C & NL | 4.28 **     |         |
|             |               | 28°C & ZK | 6.81 **     |         |
|             | 17°C/28°C     | BR & NL   | 0.77        |         |
|             |               | BR & ZK   | 1.09        |         |
|             |               | MG & NL   | 1.24        |         |
|             |               | MG & ZK   | 2.41 **     |         |
|             | NL/ZK         | 17°C & BR | 0.74        |         |
|             |               | 17°C & MG | 0.85        |         |
|             |               | 28°C & BR | 1.03        |         |
|             |               | 28°C & MG | 1.64*       |         |
|             | <i>CG3835</i> | BR/MG     | 17°C & NL   | 0.33 ** |
|             |               |           | 17°C & ZK   | 0.21 *  |
|             |               |           | 28°C & NL   | 0.61 *  |
|             |               |           | 28°C & ZK   | 0.40 *  |
| 17°C/28°C   |               | BR & NL   | 0.89        |         |
|             |               | BR & ZK   | 0.70        |         |
|             |               | MG & NL   | 1.08        |         |
|             |               | MG & ZK   | 2.03        |         |
| NL/ZK       |               | 17°C & BR | 1.04        |         |
|             |               | 17°C & MG | 0.67        |         |
|             |               | 28°C & BR | 0.82        |         |
|             |               | 28°C & MG | 1.27        |         |

mRNA abundance was measured via RT-qPCR in brains (BR) and midguts (MG) of third instar larvae reared at 17°C or 28°C. *lacZ* reporter gene expression was either driven by the promoter of *ph-p* or the *CG3835* promoter. Promoter and adjacent regulatory regions were either derived from a European strain from the Netherlands (NL) or an African one from Zimbabwe (ZK). Statistical testing included t-tests and correction for multiple testing. \* $P < 0.05$ , \*\* $P < 0.01$  (FDR=0.05).
